# Supplementary material
Source: PubMed Central journal article supplement (PMC9547957)
Supplement: NIHMS1826134-supplement-2.pdf [file NIHMS1826134-supplement-2.pdf]

## SUPPLEMENTARY TABLES

### Single cell sequencing reveals trajectory of tumor-infiltrating lymphocyte states in pancreatic cancer

|                                |   |
|--------------------------------|---|
| 1. Supplementary Table S2..... | 2 |
| 2. Supplementary Table S3..... | 3 |

Supplementary Table S2. Patient clinical characteristics

| Number:                            | Age: | Sex: | Diagnosis:                                                                                                        | Location:          | Max Diameter (mm): | TNM Classification: | Staging:     | CA19-9 (U/mL):       | Pre-treatment:                                                                        |
|------------------------------------|------|------|-------------------------------------------------------------------------------------------------------------------|--------------------|--------------------|---------------------|--------------|----------------------|---------------------------------------------------------------------------------------|
| MDA1_T01                           | 71   | M    | Poorly differentiated pancreatic ductal adenocarcinoma                                                            | Pancreas head      | 50                 | T3N1M0              | IIB          | 723                  | N/A                                                                                   |
| MDA1_T02                           | 68   | M    | Moderately differentiated ductal adenocarcinoma                                                                   | Pancreas tail      | 38                 | T3N1M0              | IIB          | 53                   | Pembrolizumab, Gemcitabine, Abraxane                                                  |
| MDA1_T03                           | 70   | M    | Moderate to poorly differentiated ductal adenocarcinoma                                                           | Pancreas tail      | 28                 | T3N1M0              | IIB          | <1                   | Gemcitabine and Abraxane                                                              |
| MDA1_T04                           | 67   | M    | Moderately differentiated ductal adenocarcinoma                                                                   | Pancreas body/tail | 80                 | T3N2M0              | III          | 170                  | Gemcitabine                                                                           |
| MDA1_T05<br>MDA1_U05               | 69   | M    | Moderate to poorly differentiated ductal adenocarcinoma                                                           | Pancreas body/tail | 40                 | T2N1M0              | IIB          | 202                  | FOLFIRINOX                                                                            |
| MDA1_T06                           | 76   | F    | Moderate to poorly differentiated ductal adenocarcinoma                                                           | Pancreas head      | 32                 | T2N0M0              | IB           | 95                   | Gemcitabine, Abraxane, Capecitabine                                                   |
| MDA1_T07                           | 73   | M    | Poorly differentiated pancreatic ductal adenocarcinoma                                                            | Pancreas head      | 21                 | T2N1M0              | IIB          | 41                   | FOLFIRINOX                                                                            |
| MDA2_T01                           | 74   | F    | Moderately differentiated ductal adenocarcinoma                                                                   | Pancreas head      | 3.4                | T2N2M0              | III          | N/A                  | none                                                                                  |
| MDA2_T02<br>MDA2_U02               | 71   | M    | Poorly differentiated pancreatic ductal adenocarcinoma                                                            | Pancreas head      | 3                  | T2N1M0              | IIB          | N/A                  | none                                                                                  |
| MDA2_T03                           | 64   | F    | Moderately differentiated ductal adenocarcinoma                                                                   | Pancreas head      | 2.5                | T2N2M0              | III          | N/A                  | none                                                                                  |
| MDA2_T04                           | 67   | F    | Poorly differentiated pancreatic ductal adenocarcinoma                                                            | Pancreas head      | 34                 | T2N2M0              | III          | 15.2                 | FOLFIRINOX, CXRT 50.4 in 28 with Capecitabine                                         |
| MDA2_T05<br>MDA2_U05               | 56   | M    | Poorly differentiated pancreatic ductal adenocarcinoma                                                            | Pancreas Tail      | 48                 | T3N0M0              | IIA          | 11.6                 | N/A                                                                                   |
| MDA2_T06                           | 66   | M    | Poorly differentiated pancreatic ductal adenocarcinoma                                                            | Pancreas Tail      | 23                 | T2N0M0              | IB           | 36.9                 | N/A                                                                                   |
| MDA2_T07                           | 63   | M    | Moderately differentiated ductal adenocarcinoma                                                                   | Pancreas Neck      | 48                 | T3N1M0              | IIB          | 390                  | FOLFIRINOX, SBRT 50 gy in 5 dose                                                      |
| MDA2_T08<br>MDA2_U08               | 53   | F    | Moderately differentiated ductal adenocarcinoma                                                                   | Pancreas head      | 45                 | T3N1M0              | IIB          | 112.2                | FOLFIRINOX, Gemcitabine and nab-paclitaxel , CXRT 50.4 in 28 with Capecitabine        |
| MDA2_T09<br>MDA2_U09               | 69   | F    | Moderate to poorly differentiated ductal adenocarcinoma                                                           | Pancreas head      | 30                 | T3N1M0              | IIB          | 14.4                 | N/A                                                                                   |
| MDA2_T10                           | 64   | M    | Moderately differentiated ductal adenocarcinoma                                                                   | Pancreas head      | 33                 | T2N1M0              | IIB          | 3563                 | FOLFIRINOX, SBRT 36 gy in 5 dose                                                      |
| MDA2_T11<br>MDA2_U11               | 71   | F    | Moderate to poorly differentiated ductal adenocarcinoma                                                           | Pancreas head      | 35                 | T2N2M0              | III          | 30.3                 | N/A                                                                                   |
| MDA2_U12                           | 76   | F    | Moderate to poorly differentiated ductal adenocarcinoma                                                           | Pancreas head      | 25                 | T2N0M0              | IB           | 57.4                 | N/A                                                                                   |
| MDA2_T13                           | 57   | F    | Moderate to poorly differentiated ductal adenocarcinoma                                                           | Pancreas head      | 37                 | T2N1M0              | IIB          | 39.7                 | Gemcitabine, nab-paclitaxel and pembro + Vit D                                        |
| MDA2_T14                           | 61   | M    | Moderate to poorly differentiated ductal adenocarcinoma arising in intraductal papillary mucinous neoplasm (IPMN) | Pancreas head      | 60                 | T3N1M0              | IIB          | 7.9                  | FOLFIRINOX                                                                            |
| MDA2_T15<br>MDA2_U15               | 76   | F    | Moderately differentiated duodenal adenocarcinoma                                                                 | Duodenum           | 35                 | T4N0M0              | IIB          | 33.9                 | N/A                                                                                   |
| MDA2_T16                           | 63   | F    | Poorly differentiated pancreatic ductal adenocarcinoma                                                            | Pancreas Body      | 35                 | T2N1M0              | IIB          | 110.7                | Gemcitabine and nab-paclitaxel , CXRT 50.4 in 28 with Capecitabine and nab-paclitaxel |
| MDA2_T17<br>MDA2_U17               | 67   | F    | Poorly differentiated pancreatic ductal adenocarcinoma                                                            | Pancreas head      | 55                 | T3N1M0              | IIB          | 390.8                | FOLFIRINOX, CXRT 30 in 10 with Capecitabine                                           |
| MDA2_T18A<br>MDA2_T18B<br>MDA2_U18 | 71   | M    | Poorly differentiated pancreatic ductal adenocarcinoma                                                            | Pancreas head      | 50                 | T3N1M0              | IIB          | 723.4 (tot bil 4.7)  | N/A                                                                                   |
| MDA2_T19                           | 65   | M    | Poorly differentiated pancreatic ductal adenocarcinoma                                                            | Pancreas head      | 26                 | T2N1M0              | IIB          | 631.9 (tot bil 2.0)  | FOLFIRINOX                                                                            |
| MDA2_T20                           | 74   | M    | Moderately differentiated ductal adenocarcinoma                                                                   | Pancreas Body      | 33                 | T3N1M0              | IIB          | 993.5                | N/A                                                                                   |
| MDA2_T21                           | 68   | M    | Moderately differentiated ductal adenocarcinoma                                                                   | Pancreas Tail      | 38                 | T3N1M0              | IIB          | 55.4                 | Gemcitabine, nab-paclitaxel and pembro + Vit D                                        |
| MDA2_T22                           | 62   | F    | Moderately differentiated ductal adenocarcinoma                                                                   | Pancreas Body      | 27                 | T4N0M0              | III          | 39.6                 | FOLFIRINOX, CXRT 50.4 in 28 with Capecitabine                                         |
| MDA2_T23                           | 45   | M    | Moderately differentiated ductal adenocarcinoma                                                                   | Pancreas head      | 40                 | T3N1M0              | IIB          | 453.7 (tot bili 2.7) | FOLFIRINOX                                                                            |
| MDA2_T24<br>MDA2_U24               | 76   | F    | Intraductal papillary mucinous neoplasm with low and focal high grade dysplasia                                   | Pancreas head      | 45                 | TisN0M0             | No carcinoma | 8.6                  | N/A                                                                                   |
| MDA2_T25                           | 69   | F    | Moderately differentiated ductal adenocarcinoma                                                                   | Pancreas body/tail | 80                 | T3N1M0              | IIB          | 23                   | N/A                                                                                   |
| MDA2_T26                           | 67   | F    | Moderately differentiated ductal adenocarcinoma                                                                   | Pancreas head      | 14                 | T2N1M0              | IIB          | 4.7                  | FOLFIRINOX, SBRT 36 gy in 5 dose                                                      |

**Supplementary Table S3.** Sample sequencing read counts

|                | n_tcells | mean_reads_per_cell | median_genes_per_cell | median_UMI_per_tcell |
|----------------|----------|---------------------|-----------------------|----------------------|
| MDA1_T01       | 428      | 269301              | 1380.5                | 3200                 |
| MDA1_T02       | 28       | 291884              | 1082                  | 2325                 |
| MDA1_T03       | 111      | 1140302             | 1224                  | 3056                 |
| MDA1_T04       | 716      | 62337               | 819                   | 1815                 |
| MDA1_T05       | 655      | 50908               | 873                   | 2171.5               |
| MDA1_U05       | 508      | 18636               | 405                   | 718                  |
| MDA1_T06       | 73       | 505070              | 1780                  | 4946                 |
| MDA1_T07       | 626      | 210908              | 478                   | 802                  |
| MDA1_T01 Grown | 4886     | 33133               | 1535                  | 3775                 |
| MDA1_T02 Grown | 7728     | 30311               | 1477                  | 3522.5               |
| MDA1_T03 Grown | 7030     | 27868               | 1777                  | 4559                 |
| MDA1_T04 Grown | 7339     | 28495               | 1560                  | 4030                 |
| MDA1_T05 Grown | 6878     | 27030               | 1736                  | 4733                 |
| MDA1_T07 Grown | 6204     | 27894               | 1931                  | 5336                 |
| MDA2_T01       | 1110     | 17229               | 745                   | 1854.5               |
| MDA2_U02       | 112      | 26453               | 849.5                 | 2231.5               |
| MDA2_T02       | 531      | 24404               | 808                   | 2087                 |
| MDA2_T03       | 2074     | 18782               | 736                   | 1771.5               |
| MDA2_T04       | 1414     | 26015               | 741.5                 | 1553                 |
| MDA2_U05       | 87       | 19941               | 907                   | 2562                 |
| MDA2_T05       | 246      | 19552               | 1002.5                | 2764.5               |
| MDA2_T06       | 802      | 15824               | 807.5                 | 2108.5               |
| MDA2_T07       | 674      | 14881               | 902                   | 2129                 |
| MDA2_U08       | 94       | 18541               | 878.5                 | 2119.5               |
| MDA2_T08       | 23       | 41398               | 1024                  | 2675                 |
| MDA2_U09       | 204      | 52464               | 925.5                 | 2239.5               |
| MDA2_T09       | 44       | 64906               | 837                   | 1946                 |
| MDA2_T10       | 1396     | 33858               | 872                   | 2371                 |
| MDA2_U11       | 191      | 44904               | 761                   | 1822                 |
| MDA2_T11       | 105      | 47863               | 889                   | 2055                 |
| MDA2_U12       | 287      | 9806                | 689                   | 1556                 |
| MDA2_T13       | 104      | 20010               | 1043                  | 2678                 |
| MDA2_T14       | 132      | 12226               | 1062.5                | 2760.5               |
| MDA2_U15       | 218      | 8693                | 807                   | 2136.5               |
| MDA2_T15       | 138      | 5926                | 753                   | 1929.5               |
| MDA2_T16       | 961      | 20075               | 813                   | 1911                 |
| MDA2_U17       | 214      | 25643               | 1114.5                | 3487                 |
| MDA2_T17       | 104      | 61744               | 1148.5                | 3312.5               |
| MDA2_U18       | 1185     | 21275               | 790                   | 1985                 |
| MDA2_T18A      | 96       | 12234               | 766                   | 1904.5               |
| MDA2_T18B      | 52       | 11884               | 875.5                 | 2074                 |
| MDA2_T19       | 1371     | 21258               | 906                   | 2269                 |
| MDA2_T20       | 160      | 27255               | 792                   | 1998.5               |
| MDA2_T21       | 7        | 101098              | 1046                  | 2679                 |
| MDA2_T22       | 1115     | 16401               | 777                   | 1792                 |
| MDA2_T23       | 235      | 22789               | 748                   | 1876                 |
| MDA2_U24       | 236      | 36296               | 1023                  | 2682.5               |
| MDA2_T24       | 108      | 124011              | 1096                  | 3047                 |
| MDA2_T25       | 631      | 13051               | 842                   | 2145                 |
| MDA2_T26       | 2558     | 13648               | 801                   | 1859.5               |
